# Supplementary material for: Influenza A–induced cystic fibrosis transmembrane conductance regulator dysfunction increases susceptibility to Streptococcus pneumoniae
Source: PubMed Central journal article supplement (PMC10443798; doi:10.1172/jci.insight.170022), 2023-07-24
Supplement: jciinsight-8-170022-s038.pdf [file jciinsight-8-170022-s038.pdf]

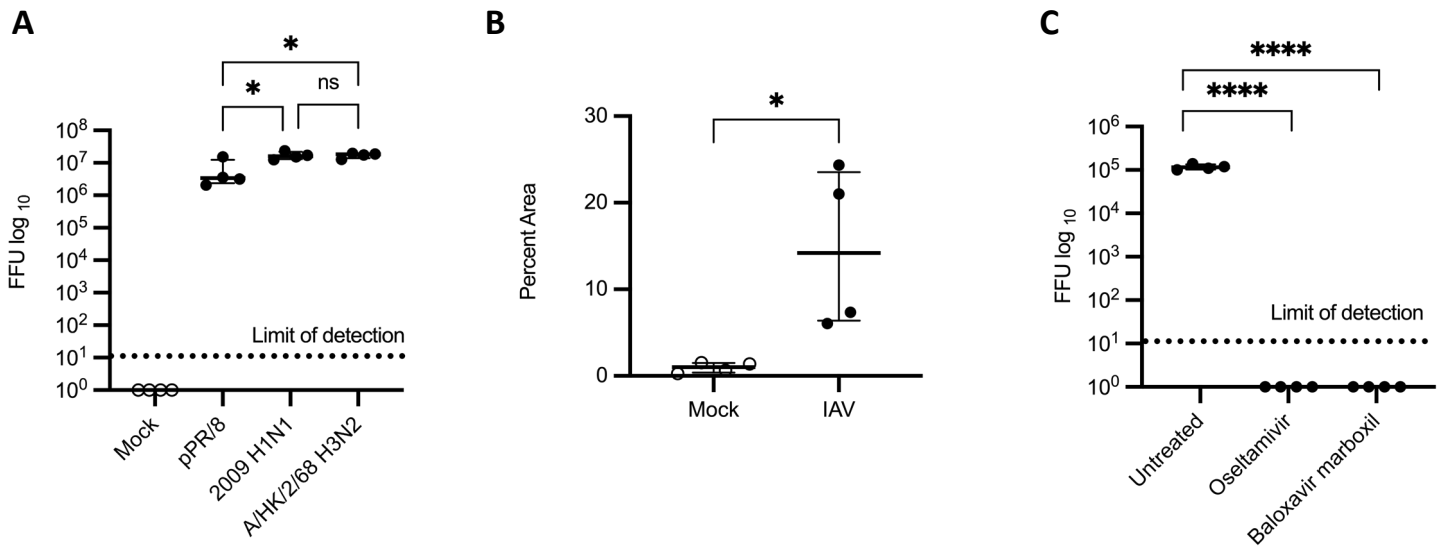

**Supplemental Figure 1** (A) HBECS were infected with 150,000 PFU IAV for 72 hours, followed by infection with 1,000 CFU *Spn*. IAV was quantified by foci assay of apical washes collected after six hours of *Spn* infection. (B) HBECS were infected with 100,000 PFU of IAV (pH1N1) for 72 hours, then stained with trypan blue to quantify cell death. Images were obtained using the Leica DMI1 at 5X magnification and trypan blue staining was quantified using Image J. (C) HBECS were infected with 100,000 PFU of IAV and treated basally with 1mM oseltamivir or 100nM baloxavir marboxil for 72 hours, followed by infection with 1,000 CFU *Spn*. IAV was quantified by foci assay of apical washes collected after six hours of *Spn* infection. Panels A and C were analyzed by one-way ANOVA. Panel B was analyzed by unpaired t-test. \*, \*\*, \*\*\*, \*\*\*\* indicates p of < 0.05, 0.01, 0.001, 0.0001 respectively. Brackets indicate median and interquartile range. Open circles indicate mock IAV infection, closed circles indicate IAV infection.

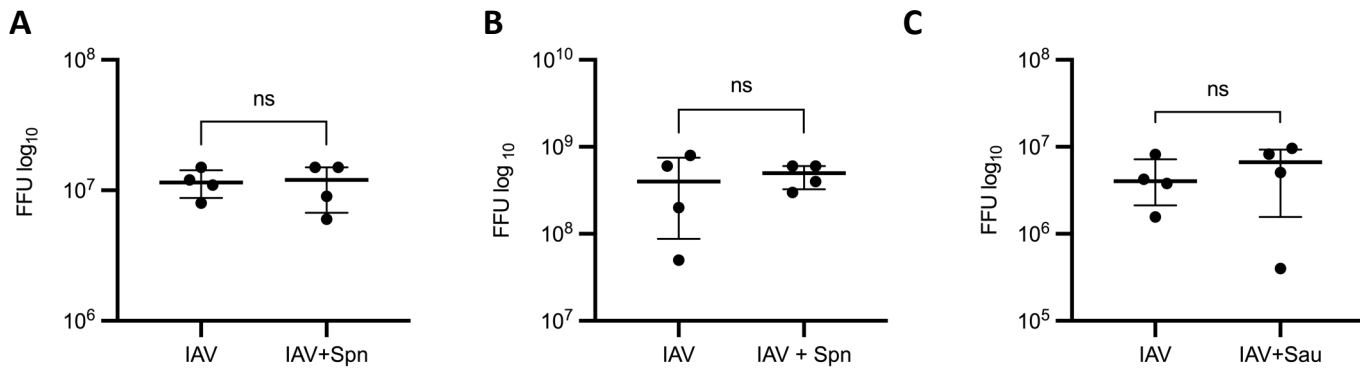

**Supplemental Figure 2.** (A) Primary differentiated human nasal cells or (B) HBECs isolated from the lungs of a 15 month old were infected with 100,000 PFU of IAV for 72 hours, followed by infection with 1,000 CFU *Spn*. IAV was quantified by foci forming assay of apical washes collected after six hours of *Spn* infection. (C) HBECs were infected with 100,000 PFU of IAV for 72 hours, followed by infection with 1,000 CFU *Staphylococcus aureus*. IAV was quantified by foci forming assay of apical washes collected after six hours of *Staphylococcus aureus* infection. All panels were analyzed by unpaired t-test. \*, \*\*, \*\*\*, \*\*\*\* indicates p of < 0.05, 0.01, 0.001, 0.0001 respectively. Brackets indicate median and interquartile range.

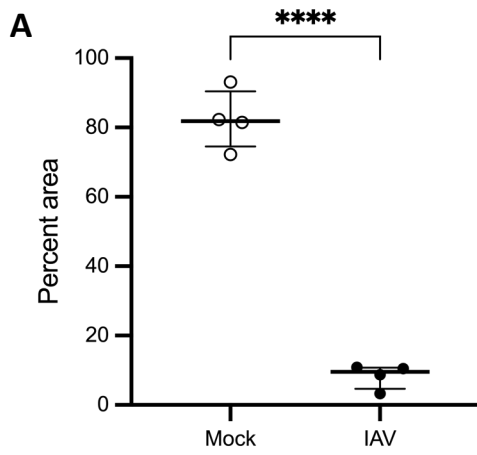

**Supplemental Figure 3. (A)** HBECs were infected with 100,000 PFU IAV for 72 hours and stained for cilia (white), F-actin (green), IAV (red) and mounted in DAPI Fluoromount (blue). Images were taken at 40X magnification on a Nikon A1R-HD25. Cilia was quantified using Image J on four fields of view from one biological replicate.

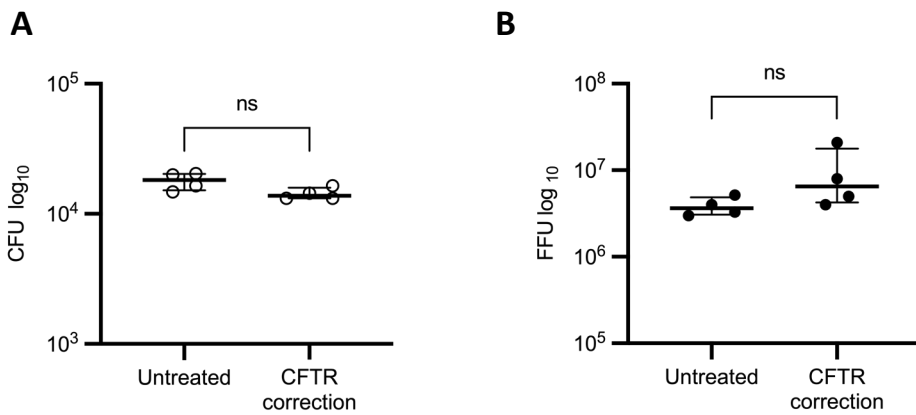

**Supplemental Figure 4. (A)** HBECs were basally treated with 10uM lumacaftor and tezacaftor for 72 hours and basally treated with 10uM ivacaftor overnight before *Spn* infection. After treatment, HBECs were infected with 1,000 CFU for six hours before apical washes were collected. *Spn* was quantified by vertical plating of apical washes. **(B)** HBECs were infected with IAV and basally treated with 10uM lumacaftor and tezacaftor and then basally treated with 10uM ivacaftor overnight before apical wash collection. After 72 hours of IAV infection, apical washes were collected and IAV was quantified by foci forming assay. All panels were analyzed by unpaired t-test. \*, \*\*, \*\*\*, \*\*\*\* indicates p of < 0.05, 0.01, 0.001, 0.0001 respectively. Brackets indicate median and interquartile range. Open circles indicate mock IAV infection, closed circles indicate IAV infection.

**A**

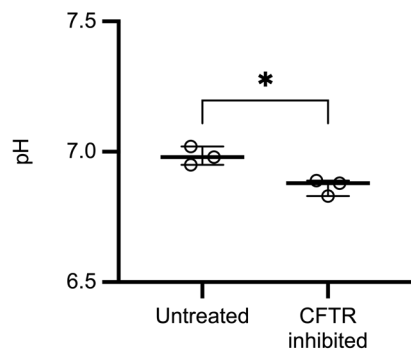

**Supplemental Figure 5. (A)** HBECs were basally treated with 20uM of CFTRinh172 for 72 hours before pH measurements were taken. Analyzed by unpaired t-test, \* indicates  $p < 0.05$ . Brackets indicate median and interquartile range.

| Categories                                               | Diseases or Functions Annotation  | p-value  | Activation z-score | Molecules                                                                                                                                                                                                                                                                                                                                                                                                                                                                                                                                                              | # Proteins in Data |
|----------------------------------------------------------|-----------------------------------|----------|--------------------|------------------------------------------------------------------------------------------------------------------------------------------------------------------------------------------------------------------------------------------------------------------------------------------------------------------------------------------------------------------------------------------------------------------------------------------------------------------------------------------------------------------------------------------------------------------------|--------------------|
| Infectious Diseases, Organismal Injury and Abnormalities | Viral Infection                   | 3.24E-20 | -1.71              | ACLY,ACTR2,ANK3,APOD,ARRDC1,ATP5F1B,ATP5IF1,B2M,BAIAP2,C3,C4A/C4B,C6,CAPN5,CCT2,CCT8,CD14,CD55,CDH1,CFB,CHMP4B,CIB1,CLIP1,CLTC,CNP,COPB1,COPB2,CROCC,CSE1L,CXCL10,DCTN1,DDR1,DDX42,DHX15,EEF2,EIF2S1,EIF3E,EIF3I,EP8,F11R,FASN,FLII,FLOT2,FUBP1,GAPDH,HSPA4,HSPA5,ISG15,KARS1,LCN2,LMNA,LTF,MAT2A,MGAT5,MVP,MX1,MYO5B,MYOF,NCL,NPM1,NRP2,NT5E,PDCD6IP,PKM,PML,PPIB,PROS1,PRPF8,PSMA2,RAC1,RALB,RAP1B,RNH1,RPL12,RPL5,RPS10,RPS14,RPS16,RPS5,SERPINA1,SERPINE1,SLC9A3R1,SLPI,SNRPA,SNRPD1,SPINT1,SPON2,SPTBN1,SSB,ST6GAL1,STIP1,TMEM132A,TSG101,VCP,WFDC2,XPINPEP1,XPO1 | 96                 |
| Infectious Diseases, Organismal Injury and Abnormalities | Replication of virus              | 3.97E-10 | -0.87              | ATP5F1B,B2M,CHMP4B,COPB1,COPB2,CSE1L,CXCL10,DDX42,EIF2S1,EIF3E,F11R,FASN,FUBP1,HSPA5,ISG15,MVP,MX1,MYO5B,NCL,NPM1,PDCD6IP,PML,PRPF8,RPS10,RPS14,RPS16,RPS5,SERPINA1,SLC9A3R1,SLPI,SNRPD1,TSG101,VCP,XPINPEP1,XPO1                                                                                                                                                                                                                                                                                                                                                      | 35                 |
| Infectious Diseases, Organismal Injury and Abnormalities | Sepsis                            | 8.98E-10 | -1.485             | ACTR2,B2M,BAIAP2,C3,C4A/C4B,CD14,CD55,CLTC,COPB1,CTSC,EEF2,GOLM1,HSPA5,ISG15,LCN2,LMNB1,LTF,MUC1,MX1,RALB,RAP1B,SEC23A,SEC23B,SERPINE1,SERPING1,VAPA                                                                                                                                                                                                                                                                                                                                                                                                                   | 26                 |
| Infectious Diseases, Organismal Injury and Abnormalities | Release of virus                  | 8.7E-07  | 1.649              | CHMP4B,HSPA5,ISG15,LMNA,PDCD6IP,SSB,TSG101,VCP                                                                                                                                                                                                                                                                                                                                                                                                                                                                                                                         | 8                  |
| Infectious Diseases, Organismal Injury and Abnormalities | Production of virus               | 6.72E-06 | -0.243             | CCT8,CD14,CNP,CSE1L,MX1,PDCD6IP,PML,SERPINA1,TSG101,XPO1                                                                                                                                                                                                                                                                                                                                                                                                                                                                                                               | 10                 |
| Infectious Diseases, Organismal Injury and Abnormalities | Replication of Influenza A virus  | 1.62E-05 | -2.034             | B2M,COPB1,COPB2,CSE1L,DDX42,ISG15,MX1,PML,PRPF8,RPS10,RPS14,RPS16,RPS5,SLPI,XPINPEP1,XPO1                                                                                                                                                                                                                                                                                                                                                                                                                                                                              | 16                 |
| Cell-To-Cell Signaling and Interaction                   | Binding of bacteria               | 0.000015 | 1.757              | CD55,CFH,LTF,MUC1,NCL,PIGR                                                                                                                                                                                                                                                                                                                                                                                                                                                                                                                                             | 6                  |
| Cell-To-Cell Signaling and Interaction                   | Adhesion of bacteria              | 2.94E-05 | 1.977              | CFH,LTF,MUC1,PIGR                                                                                                                                                                                                                                                                                                                                                                                                                                                                                                                                                      | 4                  |
| Cellular Function and Maintenance                        | Engulfment of bacteria            | 4.49E-05 | 2.604              | C3,C6,CD14,CFH,LCN2,PIGR,RAC1                                                                                                                                                                                                                                                                                                                                                                                                                                                                                                                                          | 7                  |
| Humoral Immune Response, Inflammatory Response           | Complement-dependent cytotoxicity | 4.85E-05 |                    | C3,CD55,CD59,CFH                                                                                                                                                                                                                                                                                                                                                                                                                                                                                                                                                       | 4                  |
| Organismal Injury and Abnormalities, Respiratory Disease | Lung injury                       | 7.04E-05 | 0                  | AZGP1,C3,C4A/C4B,CD14,CFB,CXCL10,GAPDH,HSPA5,MMP7,MUC1,NT5E,PKM,RAC1,SERPINE1                                                                                                                                                                                                                                                                                                                                                                                                                                                                                          | 14                 |
| Organismal Injury and Abnormalities, Respiratory Disease | Damage of lung                    | 3.72E-06 | -0.045             | AZGP1,C3,C4A/C4B,CD14,CFB,CXCL10,GAPDH,HSPA5,MMP7,MUC1,MVP,NT5E,PKM,RAC1,SERPINE1,SERPING1,SLPI                                                                                                                                                                                                                                                                                                                                                                                                                                                                        | 17                 |

**Supplemental table 1.** HBECs were infected with 100,000 PFU of IAV for 72 hours before apical washes were collected for proteomic analysis. GO analysis was conducted using the Qiagen IPA software following the standard statistical analysis protocol.
